# Supplementary material
Source: PubMed Central journal article supplement (PMC3635074)

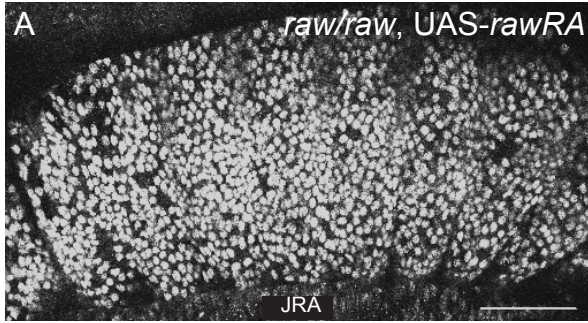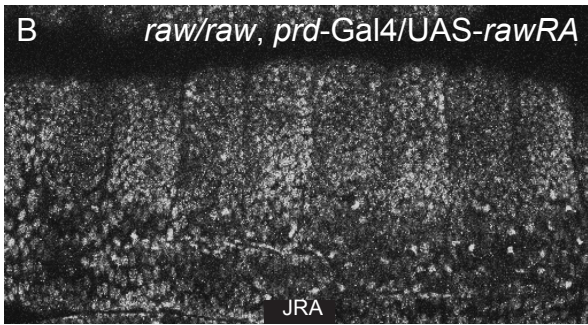

Supplemental Figure 1

Supplement: NIHMS380867-supplement-01.pdf [file NIHMS380867-supplement-01.pdf]

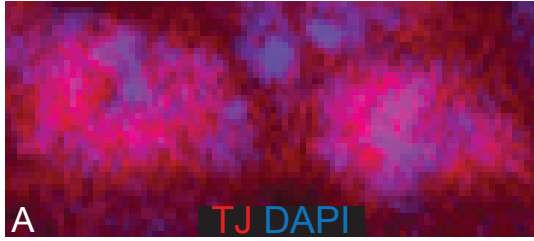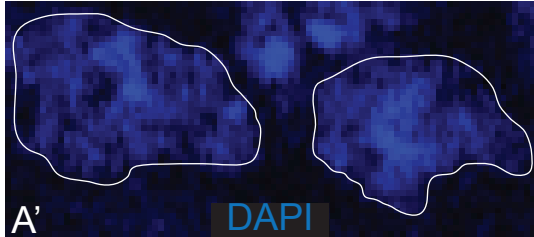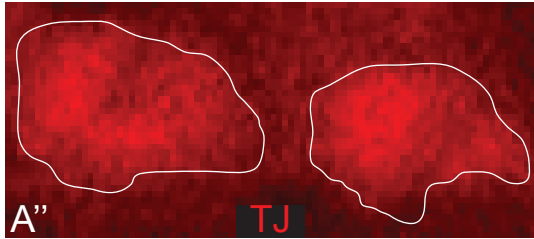

Supplemental Figure 2

Supplement: NIHMS380867-supplement-02.pdf [file NIHMS380867-supplement-02.pdf]

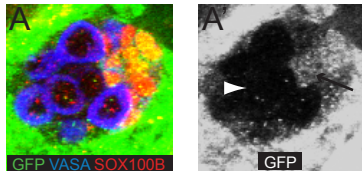

Supplemental Figure 3

Supplement: NIHMS380867-supplement-03.pdf [file NIHMS380867-supplement-03.pdf]

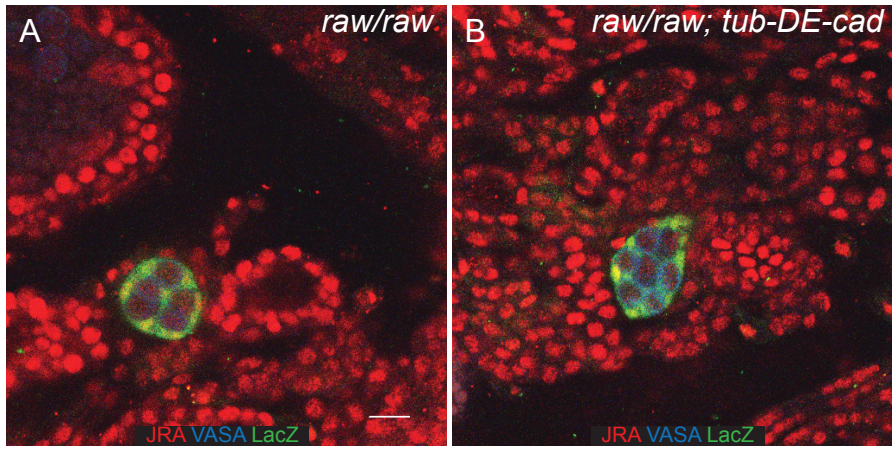

Supplemental Figure 4

Supplement: NIHMS380867-supplement-04.pdf [file NIHMS380867-supplement-04.pdf]
